# Supplementary material
Source: publisher site journal article supplement (https://neobiota.pensoft.net/article/52764/download/suppl/31/)
Supplement: Supplementary file 1

## Supplementary Material

### Part 1—Guidance on the status confidence rating

These categories are adapted from Hawkins et al. (2015).

\*Note: these levels reflect the confidence of a plant's status at the time it was assessed.

| Confidence Level                       | Determination                                                                                                                                                                                                                                                                                                                                             |
|----------------------------------------|-----------------------------------------------------------------------------------------------------------------------------------------------------------------------------------------------------------------------------------------------------------------------------------------------------------------------------------------------------------|
| <b>High</b> (About 90% certainty)      | Status is based on direct observational evidence<br><i>and</i><br>Status is based on thorough surveying or multiple occurrence records<br><i>and</i><br>Data sources are recent, reliable, of good quality and are not controversial or contradictory                                                                                                     |
| <b>Medium</b> (About 65-75% certainty) | Status is based on direct observational evidence but some information is inferred<br><i>and/or</i><br>Status is based on partial surveying or an insufficient number of occurrence records<br><i>and/or</i><br>Data sources may be somewhat out of date, questionable in their reliability and quality, <i>and/or</i> somewhat ambiguous or contradictory |
| <b>Low</b> (About 35% certainty)       | Status is based entirely, or almost entirely, on inferred information<br><i>and/or</i><br>Status is based on insufficient surveying or a single-few occurrence records<br><i>and/or</i><br>Data sources do not exist, or are outdated and of very poor quality                                                                                            |

## Part 2—Adapting a Regional Checklist to Track Invasion Statuses

### Original Checklist

| Species   |
|-----------|
| Species A |
| Species B |
| Species C |
| Species D |
| Species E |
| Species F |
| Species G |
| Species H |
| Species I |

Categorize species and assign confidence levels based on a variety of data sources about the plant in the location/region examined

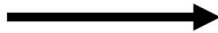

**Example data sources:**  
existing checklist categories, reports, surveys, herbarium labels, photographs

### Tracking Scheme: Field-based Status

| Status                               | Confidence Level |
|--------------------------------------|------------------|
| Potentially Naturalizing*            | High             |
| Not Self-Sustaining                  | Low              |
| Naturalized Where Introduced         | High             |
| Naturalized–Unspecified              | Low              |
| Not Self-Sustaining                  | High             |
| Naturalized–Unspecified              | Medium           |
| Naturalized Beyond Introduction Site | High             |
| Extirpated                           | Low              |
| Naturalized–Unspecified              | Low              |

\* High priority for Eradication Assessment

Infer likely status of species with low-medium confidence levels using data that is not location specific

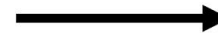

**Example inferential tools:**  
weed risk assessments, species distribution models, dispersal kernels, seedbank longevity, detection probability models

### Tracking Scheme: Inferred Likely Status

| Likely Status           |
|-------------------------|
| NA                      |
| Not Self-Sustaining     |
| NA                      |
| Not Self-Sustaining     |
| NA                      |
| Naturalized–Unspecified |
| NA                      |
| Data deficient**        |
| Data deficient**        |

\*\* Highest priority for follow up surveys
